# Supplementary material for: Newly Developed MAGIC Population Allows Identification of Strong Associations and Candidate Genes for Anthocyanin Pigmentation in Eggplant
Source: Front Plant Sci. 2022 Mar 7;13:847789. doi: 10.3389/fpls.2022.847789 (PMC8940277; doi:10.3389/fpls.2022.847789)
Supplement: Supplementary file 5 [file Table_1.XLSX]

## Sheet: Supplementary Data S3
Supplementary Data S3. List of candidate genes for plant anthocyanins (PA), fruit anthocyanins (FA) and anthocyanin pigmentation under the calyx (PUC).
Chr		Genomic region (pb)				Block position (pb)			Gene position (pb)			Candidate gene
		name	From	to		from	to		from	to		Abbreviation	name
1		FA1	5117858	5873996		5262859	5480282		5386038	5,3874,95		MYB113†	SMEL_001g120500.1
		PUC1				5346977	5766934
9		PA9	17005581	17398267		17231815	17398244		17862090	17872428		BHLH‡	SMEL_009g326640.1
		FA9	16201929	17398267
10		PUC10.1	2087258	2667355		2146785	2667328		3128678	3143068		SPA3‡	SMEL_010g338090.1
		PUC10.2	3940046	4337038		4141969	4337038		4294382	4308118		COP1†	SMEL_010g339180.1
		PA10, FA10, PUC10.3	91087789	94921271		91087789	92755635		92326476	92331202		MYB113†	SMEL_010g351850.1
†,‡ indicate, respectively, candidate genes detected close to or within LD blocks.
